# Supplementary material for: Heat capacity of SrFeO3–δ; δ = 0.50, 0.25 and 0.15 – configurational entropy of structural entities in grossly non-stoichiometric oxidesElectronic supplementary information (ESI) available: the experimental molar heat capacities of SrFeO2.54, SrFeO2.725 and SrFeO2.833 at sub-ambient temperatures and the corresponding data for SrFeO2.50, SrFeO2.74, SrFeO2.82, SrFeO2.833 and SrFeO2.85 at super-ambient temperatures. See http://www.rsc.org/suppdata/dt/b2/b209236k/
Source: Royal Society of Chemistry journal article supplement (doi:10.1039/b209236k), 2002-12-24
Supplement: b209236k.doc [file b209236k.doc]

# Supplementary data

**Heat capacity of SrFeO3-; = 0.50, 0.25 and 0.15 – configurational entropy of structural entities in grossly non-stoichiometric oxides**

Camilla Haavik, Egil Bakken, Truls Norby, Svein Stølen

*Department of Chemistry, University of Oslo, Postbox 1033 Blindern, N0315 Oslo, Norway -* [svein.stolen@kjemi.uio.no](mailto:svein.stolen@kjemi.uio.no)

Tooru Atakeand Takeo Tojo

*Tokyo Institute of Technology, Materials and Structures Laboratory, 4259 Nagatsuta-cho, Midori-ku, Yokohama, 226-8503, Japan*

**Table:** Heat capacity of SrFeO2.50, SrFeO2.725 and SrFeO2.833 at sub-ambient conditions

| SrFeO2.50 | | SrFeO2.725 | | SrFeO2.833 | |
| --- | --- | --- | --- | --- | --- |
| *T /* K | *Cp,m* / J K-1mol-1 | *T* / K | *Cp,m* / J K-1mol-1 | *T* / K | *Cp,m* / J K-1mol-1 |
| 13.150 | 0.5485 | 13.425 | 0.2787 | 12.963 | 0.4782 |
| 14.097 | 0.6382 | 14.651 | 0.3760 | 13.861 | 0.4952 |
| 15.227 | 0.8114 | 15.982 | 0.5128 | 14.958 | 0.5965 |
| 16.477 | 1.0309 | 17.356 | 0.6919 | 16.264 | 0.7459 |
| 17.786 | 1.2903 | 18.738 | 0.9210 | 17.688 | 0.9444 |
| 19.104 | 1.5844 | 20.118 | 1.2015 | 19.095 | 1.1869 |
| 20.489 | 1.9339 | 21.556 | 1.5508 | 20.554 | 1.4936 |
| 21.957 | 2.3462 | 23.067 | 1.9749 | 22.076 | 1.8746 |
| 23.449 | 2.8076 | 24.593 | 2.4621 | 23.564 | 2.3043 |
| 25.015 | 3.3378 | 26.184 | 3.0317 | 25.044 | 2.7912 |
| 26.595 | 3.9164 | 27.866 | 3.6985 | 26.569 | 3.3501 |
| 28.208 | 4.5513 | 29.666 | 4.4761 | 28.178 | 4.0035 |
| 29.879 | 5.2503 | 31.521 | 5.3435 | 29.814 | 4.7274 |
| 31.584 | 6.0047 | 33.358 | 6.2607 | 31.416 | 5.4939 |
| 33.342 | 6.8182 | 35.249 | 7.2611 | 33.043 | 6.3235 |
| 35.129 | 7.6800 | 37.109 | 8.2877 | 34.740 | 7.2412 |
| 36.922 | 8.5760 | 38.930 | 9.3372 | 36.492 | 8.2382 |
| 38.706 | 9.4947 | 40.791 | 10.441 | 38.258 | 9.2940 |
| 40.524 | 10.449 | 42.705 | 11.610 | 39.935 | 10.334 |
| 42.359 | 11.440 | 44.637 | 12.817 | 41.661 | 11.450 |
| 44.117 | 12.401 | 46.520 | 14.011 | 43.520 | 12.715 |
| 45.861 | 13.366 | 48.407 | 15.228 | 45.369 | 14.007 |
| 47.676 | 14.381 | 50.295 | 16.459 | 47.235 | 15.388 |
| 49.534 | 15.429 | 52.146 | 17.669 | 49.123 | 16.877 |
| 51.408 | 16.494 | 53.920 | 18.837 | 51.002 | 18.443 |
| 53.306 | 17.574 | 55.256 | 19.736 | 52.299 | 19.094 |
| 55.182 | 18.645 | 56.984 | 20.879 | 52.870 | 19.884 |
| 56.993 | 19.681 | 58.725 | 22.034 | 54.052 | 20.469 |
| 58.768 | 20.697 | 60.519 | 23.223 | 54.711 | 21.086 |
| 60.583 | 21.736 | 62.351 | 24.432 | 55.116 | 21.202 |
| 62.478 | 22.817 | 64.176 | 25.637 | 55.709 | 21.673 |
| 64.387 | 23.904 | 65.998 | 26.833 | 56.540 | 22.271 |
| 66.296 | 24.988 | 67.824 | 28.025 | 57.285 | 22.859 |
| 68.269 | 26.102 | 69.696 | 29.244 | 58.090 | 23.409 |
| 70.268 | 27.225 | 71.617 | 30.479 | 58.818 | 24.027 |
| 72.196 | 28.298 | 73.649 | 31.779 | 59.847 | 24.731 |
| 74.059 | 29.334 | 75.746 | 33.109 | 60.342 | 25.240 |
| 75.866 | 30.333 | 77.773 | 34.383 | 61.698 | 26.119 |
| 77.621 | 31.298 | 79.737 | 35.610 | 61.862 | 26.435 |
| 79.330 | 32.232 | 81.646 | 36.783 | 63.429 | 27.630 |
| 81.078 | 33.186 | 83.564 | 37.953 | 63.502 | 27.446 |
| 82.906 | 34.165 | 85.516 | 39.126 | 65.016 | 28.741 |
| 84.747 | 35.146 | 87.462 | 40.287 | 65.337 | 28.729 |
| 86.606 | 36.135 | 89.403 | 41.429 | 66.643 | 29.757 |
| 88.545 | 37.157 | 91.344 | 42.555 | 67.206 | 29.937 |
| 90.523 | 38.181 | 93.343 | 43.707 | 68.311 | 30.702 |
| 92.479 | 39.190 | 95.378 | 44.864 | 69.007 | 31.024 |
| 94.438 | 40.187 | 97.393 | 45.996 | 69.930 | 31.610 |
| 96.379 | 41.174 | 99.414 | 47.105 | 70.843 | 32.112 |
| 98.305 | 42.136 | 101.466 | 48.228 | 71.504 | 32.534 |
| 100.241 | 43.095 | 103.528 | 49.338 | 72.754 | 33.298 |
| 102.164 | 44.038 | 105.553 | 50.422 | 73.067 | 33.498 |
| 104.055 | 44.954 | 107.544 | 51.459 | 74.687 | 34.527 |
| 105.991 | 45.890 | 109.503 | 52.469 | 74.707 | 34.544 |
| 107.972 | 46.826 | 111.432 | 53.452 | 76.389 | 35.631 |
| 109.921 | 47.742 | 113.334 | 54.406 | 76.670 | 35.815 |
| 111.841 | 48.633 | 115.209 | 55.346 | 78.027 | 36.705 |
| 113.734 | 49.503 | 117.060 | 56.250 | 78.685 | 37.137 |
| 115.453 | 50.291 | 118.888 | 57.134 | 79.625 | 37.742 |
| 117.617 | 51.259 | 120.693 | 57.997 | 80.683 | 38.439 |
| 119.820 | 52.242 | 122.478 | 58.838 | 81.185 | 38.763 |
| 121.991 | 53.176 | 124.243 | 59.665 | 82.709 | 39.774 |
| 124.132 | 54.140 | 125.989 | 60.466 | 82.710 | 39.766 |
| 126.244 | 55.012 | 127.717 | 61.258 | 84.204 | 40.745 |
| 128.330 | 55.899 | 129.428 | 62.036 | 84.801 | 41.159 |
| 130.390 | 56.751 | 131.187 | 62.834 | 85.667 | 41.713 |
| 132.427 | 57.572 | 133.057 | 63.650 | 86.895 | 42.550 |
| 134.442 | 58.411 | 135.035 | 64.536 | 87.103 | 42.672 |
| 136.434 | 59.201 | 137.107 | 65.420 | 88.512 | 43.611 |
| 138.407 | 60.005 | 139.231 | 66.321 | 88.933 | 43.912 |
| 140.360 | 60.753 | 141.386 | 67.213 | 89.897 | 44.544 |
| 142.294 | 61.491 | 143.600 | 68.137 | 90.921 | 45.264 |
| 144.211 | 62.241 | 145.847 | 69.035 | 91.258 | 45.477 |
| 146.110 | 62.945 | 148.099 | 69.958 | 92.598 | 46.394 |
| 148.056 | 63.688 | 150.388 | 70.825 | 92.862 | 46.601 |
| 150.098 | 64.428 | 152.684 | 71.726 | 93.916 | 47.305 |
| 152.225 | 65.197 | 154.958 | 72.622 | 94.759 | 47.892 |
| 154.387 | 65.987 | 157.212 | 73.468 | 95.215 | 48.165 |
| 156.530 | 66.733 | 159.446 | 74.311 | 96.497 | 48.861 |
| 158.654 | 67.481 | 161.662 | 75.103 | 96.619 | 48.930 |
| 160.788 | 68.213 | 163.859 | 75.942 | 97.763 | 49.457 |
| 162.932 | 68.965 | 166.039 | 76.711 | 98.446 | 49.875 |
| 165.059 | 69.681 | 168.203 | 77.447 | 99.015 | 50.181 |
| 167.197 | 70.374 | 170.349 | 78.226 | 100.242 | 50.938 |
| 169.348 | 71.069 | 172.509 | 78.963 | 100.251 | 50.922 |
| 171.482 | 71.762 | 174.711 | 79.687 | 101.473 | 51.652 |
| 173.601 | 72.418 | 176.956 | 80.448 | 102.008 | 51.993 |
| 175.733 | 73.100 | 179.247 | 81.187 | 102.682 | 52.369 |
| 177.878 | 73.741 | 181.551 | 81.951 | 103.745 | 53.024 |
| 180.008 | 74.388 | 183.840 | 82.702 | 103.877 | 53.079 |
| 182.123 | 75.026 | 186.114 | 83.447 | 105.060 | 53.769 |
| 184.254 | 75.653 | 188.373 | 84.118 | 105.456 | 54.032 |
| 186.401 | 76.289 | 190.616 | 84.871 | 106.230 | 54.447 |
| 188.564 | 76.901 | 192.846 | 85.559 | 107.142 | 54.995 |
| 190.744 | 77.539 | 195.063 | 86.244 | 107.389 | 55.109 |
| 192.911 | 78.124 | 197.265 | 86.934 | 108.537 | 55.753 |
| 195.065 | 78.738 | 199.455 | 87.596 | 108.804 | 55.925 |
| 197.206 | 79.324 | 201.633 | 88.267 | 109.674 | 56.379 |
| 199.336 | 79.882 | 203.798 | 88.921 | 110.445 | 56.816 |
| 201.454 | 80.451 | 205.951 | 89.546 | 110.802 | 56.981 |
| 203.561 | 80.999 | 208.093 | 90.178 | 111.919 | 57.570 |
| 205.657 | 81.545 | 208.517 | 90.313 | 112.065 | 57.665 |
| 207.742 | 82.061 | 210.204 | 90.817 | 113.028 | 58.133 |
| 209.817 | 82.587 | 210.253 | 90.832 | 113.727 | 58.491 |
| 211.882 | 83.107 | 211.883 | 91.318 | 114.166 | 58.690 |
| 213.936 | 83.596 | 212.432 | 91.476 | 115.412 | 59.286 |
| 215.982 | 84.108 | 213.485 | 91.803 | 115.491 | 59.323 |
| 218.018 | 84.635 | 214.599 | 92.149 | 116.776 | 59.870 |
| 220.044 | 85.069 | 215.012 | 92.246 | 117.355 | 60.124 |
| 222.063 | 85.534 | 216.532 | 92.676 | 118.228 | 60.471 |
| 224.072 | 85.998 | 216.754 | 92.798 | 119.300 | 60.907 |
| 226.130 | 86.455 | 218.047 | 93.299 | 119.795 | 61.091 |
| 228.237 | 86.905 | 218.899 | 93.521 | 121.311 | 61.681 |
| 230.335 | 87.388 | 219.556 | 93.599 | 121.421 | 61.710 |
| 232.423 | 87.851 | 221.032 | 94.041 | 123.033 | 62.319 |
| 234.503 | 88.272 | 221.060 | 94.059 | 123.346 | 62.449 |
| 236.574 | 88.724 | 222.559 | 94.483 | 124.631 | 62.932 |
| 238.637 | 89.172 | 223.155 | 94.645 | 125.406 | 63.224 |
| 240.692 | 89.578 | 223.850 | 94.847 | 126.235 | 63.527 |
| 242.738 | 90.024 | 224.867 | 95.069 | 127.517 | 64.034 |
| 244.806 | 90.412 | 225.268 | 95.184 | 127.866 | 64.156 |
| 246.894 | 90.847 | 225.679 | 95.277 | 129.525 | 64.804 |
| 248.976 | 91.242 | 226.354 | 95.394 | 129.655 | 64.868 |
| 251.050 | 91.650 | 227.028 | 95.549 | 131.847 | 65.745 |
| 253.117 | 92.044 | 227.372 | 95.592 | 134.070 | 66.626 |
| 255.177 | 92.430 | 227.702 | 95.622 | 136.295 | 67.518 |
| 257.230 | 92.792 | 228.375 | 95.747 | 138.553 | 68.422 |
| 259.276 | 93.194 | 229.047 | 95.825 | 140.844 | 69.326 |
| 261.315 | 93.578 | 229.530 | 95.903 | 143.140 | 70.229 |
| 263.347 | 93.913 | 229.719 | 95.913 | 145.413 | 71.128 |
| 265.373 | 94.261 | 230.390 | 95.865 | 147.693 | 71.997 |
| 267.393 | 94.690 | 231.061 | 95.946 | 149.980 | 72.880 |
| 269.407 | 95.021 | 231.731 | 95.921 | 152.246 | 73.714 |
| 271.414 | 95.375 | 231.744 | 95.940 | 154.521 | 74.576 |
| 273.474 | 95.713 | 232.401 | 95.898 | 156.805 | 75.413 |
| 275.588 | 96.043 | 233.070 | 95.802 | 159.070 | 76.233 |
| 277.694 | 96.408 | 233.741 | 95.459 | 161.316 | 77.029 |
| 279.794 | 96.758 | 233.988 | 95.362 | 163.544 | 77.837 |
| 281.887 | 97.105 | 234.412 | 95.070 | 165.755 | 78.583 |
| 283.973 | 97.473 | 235.083 | 94.964 | 167.948 | 79.325 |
| 286.052 | 97.800 | 235.754 | 94.973 | 170.126 | 80.024 |
| 288.126 | 98.131 | 236.267 | 95.031 | 172.288 | 80.756 |
| 290.191 | 98.490 | 236.425 | 95.020 | 174.436 | 81.451 |
| 292.250 | 98.746 | 237.095 | 95.028 | 176.568 | 82.145 |
| 294.306 | 99.043 | 237.765 | 95.251 | 178.686 | 82.792 |
| 296.357 | 99.343 | 238.434 | 95.333 | 180.791 | 83.437 |
| 298.403 | 99.660 | 238.541 | 95.299 | 182.884 | 84.099 |
| 300.442 | 99.935 | 239.102 | 95.377 | 184.964 | 84.725 |
|  |  | 239.770 | 95.456 | 187.032 | 85.357 |
|  |  | 240.437 | 95.579 | 189.089 | 85.919 |
|  |  | 240.808 | 95.620 | 191.190 | 86.559 |
|  |  | 241.103 | 95.633 | 193.337 | 87.170 |
|  |  | 243.069 | 95.943 | 195.472 | 87.748 |
|  |  | 245.322 | 96.263 | 197.595 | 88.355 |
|  |  | 247.568 | 96.580 | 199.707 | 88.917 |
|  |  | 249.807 | 96.964 | 201.808 | 89.488 |
|  |  | 252.039 | 97.288 | 203.958 | 90.085 |
|  |  | 254.263 | 97.604 | 206.156 | 90.660 |
|  |  | 256.480 | 97.932 | 208.374 | 91.208 |
|  |  | 258.691 | 98.285 | 210.611 | 91.768 |
|  |  | 260.895 | 98.599 | 212.837 | 92.342 |
|  |  | 263.092 | 98.907 | 215.085 | 92.878 |
|  |  | 265.283 | 99.223 | 217.353 | 93.496 |
|  |  | 267.468 | 99.528 | 219.611 | 93.978 |
|  |  | 269.646 | 99.835 | 221.859 | 94.512 |
|  |  | 271.816 | 100.152 | 224.096 | 95.047 |
|  |  | 273.981 | 100.433 | 226.322 | 95.578 |
|  |  | 276.141 | 100.721 | 228.540 | 95.981 |
|  |  | 278.294 | 101.021 | 230.784 | 96.104 |
|  |  | 280.442 | 101.299 | 233.054 | 96.297 |
|  |  | 282.583 | 101.624 | 235.316 | 96.689 |
|  |  | 284.719 | 101.914 | 237.603 | 97.087 |
|  |  | 286.849 | 102.187 | 239.915 | 97.509 |
|  |  | 288.973 | 102.448 | 242.219 | 97.898 |
|  |  | 291.090 | 102.721 | 244.513 | 98.337 |
|  |  | 293.202 | 102.931 | 246.799 | 98.727 |
|  |  | 295.311 | 103.163 | 249.077 | 99.115 |
|  |  | 297.415 | 103.474 | 251.348 | 99.502 |
|  |  | 299.515 | 103.717 | 253.610 | 99.891 |
|  |  |  |  | 255.865 | 100.262 |
|  |  |  |  | 258.111 | 100.678 |
|  |  |  |  | 260.351 | 100.994 |
|  |  |  |  | 262.584 | 101.393 |
|  |  |  |  | 264.809 | 101.700 |
|  |  |  |  | 267.027 | 102.008 |
|  |  |  |  | 269.239 | 102.369 |
|  |  |  |  | 271.444 | 102.730 |
|  |  |  |  | 273.642 | 103.020 |
|  |  |  |  | 275.834 | 103.319 |
|  |  |  |  | 278.054 | 103.663 |
|  |  |  |  | 280.299 | 103.992 |
|  |  |  |  | 282.537 | 104.269 |
|  |  |  |  | 284.770 | 104.622 |
|  |  |  |  | 286.996 | 104.924 |
|  |  |  |  | 289.215 | 105.247 |
|  |  |  |  | 291.427 | 105.546 |
|  |  |  |  | 293.632 | 105.819 |
|  |  |  |  | 295.834 | 106.077 |
|  |  |  |  | 298.029 | 106.471 |
|  |  |  |  | 300.216 | 106.909 |

**Table 2.** Heat capacity of SrFeO2.50, SrFeO2.74, SrFeO2.82, SrFeO2.833 and SrFeO2.85 at above-ambient conditions**.**

| SrFeO2.50 | | SrFeO2.74 | | SrFeO2.82 | |
| --- | --- | --- | --- | --- | --- |
| *T /* K | *Cp,m* / J K-1mol-1 | *T* / K | *Cp,m* / J K-1mol-1 | *T* / K | *Cp,m* / J K-1mol-1 |
| 323.32 | 99.97 | 324.71 | 107.18 | 307.58 | 106.62 |
| 330.42 | 100.30 | 333.36 | 108.1 | 316.30 | 107.70 |
| 337.64 | 102.27 | 341.89 | 109.55 | 324.91 | 108.72 |
| 345.89 | 103.17 | 350.35 | 110.80 | 333.64 | 109.39 |
| 347.37 | 101.87 | 358.79 | 111.09 | 341.93 | 109.97 |
| 355.78 | 104.18 | 367.20 | 111.76 | 350.35 | 110.85 |
| 357.07 | 102.67 | 375.59 | 112.55 | 358.74 | 111.68 |
| 365.62 | 105.14 | 384.00 | 112.74 | 367.08 | 112.39 |
| 366.75 | 103.48 | 392.44 | 113.33 | 375.38 | 113.20 |
| 375.44 | 106.89 | 400.89 | 113.43 | 383.64 | 114.25 |
| 376.19 | 104.45 | 409.33 | 113.96 | 391.91 | 115.12 |
| 385.30 | 106.83 | 417.88 | 114.86 | 400.20 | 115.75 |
| 385.77 | 105.67 | 426.46 | 115.32 | 408.50 | 116.22 |
| 395.19 | 107.51 | 435.06 | 116.00 | 416.83 | 117.33 |
| 395.33 | 106.19 | 443.72 | 115.96 | 425.18 | 117.85 |
| 422.89 | 108.12 | 452.40 | 116.83 | 433.34 | 118.85 |
| 424.28 | 110.08 | 461.11 | 117.19 | 441.94 | 119.08 |
| 432.32 | 109.39 | 469.85 | 117.54 | 450.35 | 119.78 |
| 441.75 | 110.32 | 478.61 | 118.03 | 458.80 | 120.76 |
| 442.67 | 111.80 | 487.41 | 118.52 | 467.28 | 121.43 |
| 450.43 | 112.11 | 496.24 | 118.90 | 475.80 | 122.28 |
| 451.86 | 112.17 | 505.13 | 119.15 | 484.34 | 123.50 |
| 459.60 | 113.74 | 514.06 | 119.38 | 492.89 | 123.67 |
| 460.19 | 111.71 | 523.03 | 120.09 | 510.13 | 125.17 |
| 461.10 | 112.09 | 557.55 | 122.23 | 518.79 | 126.67 |
| 468.79 | 115.20 | 566.63 | 122.42 | 527.47 | 128.36 |
| 469.60 | 112.57 | 575.76 | 123.11 | 536.16 | 128.84 |
| 470.36 | 111.43 | 584.94 | 123.21 | 544.94 | 130.39 |
| 478.02 | 115.27 | 602.95 | 126.71 | 553.71 | 133.12 |
| 479.64 | 115.31 | 606.45 | 126.34 | 562.43 | 139.18 |
| 486.70 | 114.26 | 611.91 | 125.38 | 567.88 | 151.54 |
| 487.27 | 115.99 | 615.17 | 125.22 | 570.03 | 172.95 |
| 488.99 | 115.76 | 620.89 | 125.90 | 571.99 | 244.05 |
| 494.92 | 116.29 | 623.93 | 127.82 | 573.60 | 387.10 |
| 495.71 | 114.86 | 629.72 | 126.46 | 575.10 | 309.36 |
| 498.38 | 114.64 | 632.65 | 129.21 | 576.96 | 172.54 |
| 502.98 | 115.34 | 638.77 | 127.88 | 579.15 | 146.78 |
| 510.63 | 116.02 | 641.36 | 130.93 | 581.43 | 143.51 |
| 520.01 | 116.28 | 648.08 | 129.33 | 583.73 | 142.74 |
| 522.49 | 117.55 | 650.16 | 131.78 | 586.05 | 142.60 |
| 529.40 | 117.65 | 657.23 | 132.85 | 591.64 | 140.65 |
| 531.90 | 119.80 | 658.99 | 135.69 | 600.65 | 135.86 |
| 538.79 | 117.14 | 666.05 | 139.70 | 609.92 | 127.05 |
| 541.35 | 118.73 | 667.76 | 142.97 | 629.57 | 130.34 |
| 548.61 | 117.43 | 674.64 | 159.71 | 640.97 | 132.99 |
| 551.81 | 118.58 | 676.81 | 168.09 |  |  |
| 557.60 | 117.89 | 682.37 | 240.07 | SrFeO2.833 | |
| 564.22 | 117.78 | 683.61 | 278.86 | *T* / K | *Cp,m* / J K-1mol-1 |
| 573.50 | 118.67 | 687.49 | 422.97 | 439.87 | 118.71 |
| 583.29 | 120.21 | 688.00 | 603.17 | 449.09 | 120.31 |
| 593.15 | 120.38 | 688.58 | 533.48 | 458.30 | 121.11 |
| 603.01 | 120.94 | 689.49 | 702.85 | 467.52 | 122.25 |
| 612.88 | 122.03 | 690.26 | 824.99 | 486.02 | 123.10 |
| 622.77 | 122.53 | 690.95 | 878.18 | 495.27 | 124.26 |
| 632.67 | 123.09 | 691.63 | 868.01 | 504.51 | 125.22 |
| 643.62 | 123.64 | 691.65 | 841.06 | 513.74 | 124.78 |
| 653.58 | 124.21 | 692.42 | 724.83 | 522.95 | 126.68 |
| 663.58 | 126.69 | 693.55 | 344.17 | 532.14 | 128.00 |
| 673.71 | 128.99 | 695.34 | 153.84 | 541.33 | 130.07 |
| 683.86 | 131.29 | 697.61 | 149.02 | 550.52 | 132.30 |
| 694.21 | 121.05 | 700.94 | 135.79 | 559.64 | 138.08 |
| 704.75 | 121.63 | 706.68 | 130.97 | 568.16 | 211.23 |
| 714.83 | 120.12 | 711.26 | 129.28 | 576.04 | 237.14 |
| 725.00 | 120.28 | 722.89 | 129.03 | 584.45 | 132.48 |
| 735.09 | 119.58 | 734.63 | 129.54 |  |  |
| 745.39 | 118.40 | 746.46 | 130.05 | SrFeO2.85 | |
| 755.73 | 117.53 | 758.43 | 130.01 | *T* / K | *Cp,m* / J K-1mol-1 |
| 766.14 | 116.71 | 770.43 | 129.93 | 309.06 | 107.91 |
| 776.59 | 116.03 | 782.53 | 130.06 | 318.40 | 108.65 |
| 786.69 | 117.60 | 794.66 | 130.68 | 327.63 | 109.71 |
| 796.83 | 117.84 |  |  | 336.77 | 110.14 |
| 807.36 | 117.82 |  |  | 345.88 | 111.43 |
| 817.97 | 118.24 |  |  | 354.82 | 112.20 |
|  |  |  |  | 363.76 | 112.93 |
|  |  |  |  | 372.66 | 113.87 |
|  |  |  |  | 381.51 | 115.05 |
|  |  |  |  | 390.36 | 115.63 |
|  |  |  |  | 399.21 | 116.36 |
|  |  |  |  | 408.06 | 117.04 |
|  |  |  |  | 416.94 | 117.34 |
|  |  |  |  | 425.84 | 118.45 |
|  |  |  |  | 434.78 | 118.69 |
|  |  |  |  | 443.72 | 119.66 |
|  |  |  |  | 452.70 | 120.41 |
|  |  |  |  | 461.70 | 121.71 |
|  |  |  |  | 470.70 | 123.26 |
|  |  |  |  | 479.69 | 123.71 |
|  |  |  |  | 488.70 | 123.12 |
|  |  |  |  | 497.61 | 123.13 |
|  |  |  |  | 506.28 | 123.06 |
|  |  |  |  | 514.95 | 124.72 |
|  |  |  |  | 523.97 | 127.81 |
|  |  |  |  | 533.22 | 129.31 |
|  |  |  |  | 542.47 | 131.26 |
|  |  |  |  | 551.73 | 135.33 |
|  |  |  |  | 560.84 | 155.80 |
|  |  |  |  | 569.29 | 235.92 |
|  |  |  |  | 577.53 | 179.27 |
|  |  |  |  | 586.66 | 125.03 |
|  |  |  |  | 605.45 | 122.82 |
|  |  |  |  | 615.10 | 125.44 |
|  |  |  |  | 624.67 | 128.17 |
|  |  |  |  | 634.21 | 130.66 |
|  |  |  |  | 643.77 | 132.69 |
|  |  |  |  | 653.42 | 134.83 |
|  |  |  |  | 663.14 | 135.80 |
|  |  |  |  | 676.17 | 137.92 |
|  |  |  |  | 686.15 | 143.99 |
